# Supplementary material for: Selective urea electrosynthesis via nitrate and CO2 reduction on uncoordinated Zn nanosheets
Source: Royal Society of Chemistry journal article supplement (doi:10.1039/d4cc05599c), 2024-11-28
Supplement: d4cc05599c1.pdf [file d4cc05599c1.pdf]

# Supporting Information

**Selective urea electrosynthesis via nitrate and CO<sub>2</sub> reduction on  
uncoordinated Zn nanosheets**

## **Experimental Section**

### **Synthesis of Zn nanosheets**

0.002 M ZnCl<sub>2</sub> and 0.03 M urea were dissolved in 50 mL deionized water with adjusting the solution pH to 5. The mixed solution was then transferred into a Teflon-lined stainless-steel autoclave which was heated at 100 °C for 24 h. After cooling to room temperature, the precipitates were collected by centrifugation, washed with deionized water/ethanol several times and then dried overnight. The dried precipitates were further calcined at 500 °C for 1 h under air atmosphere. The obtained ZnO nanosheets were then electrochemically reduced to Zn nanosheets at -0.9 V (vs RHE) in Ar-bubbled 0.5 M NaHCO<sub>3</sub> solution. The reduced products were subjected to liquid exfoliation by ultrasonication in ethanol for 2 h to obtain pristine Zn nanosheets (P-Zn). The obtained P-Zn was further subjected to Ar plasma treatment for 10 min in an AX-1000 plasma system (13.56 MHz) to obtain uncoordinated Zn nanosheets (U-Zn).

### **Electrochemical experiments in flow cell**

Electrochemical experiments were conducted using a commercial flow cell electrolyser (101017, Gaoss Union Technology Co., LTD). A catalyst slurry was prepared by dissolving 25 mg of the catalyst in 3 mL of isopropanol and then adding 20 μL of Nafion ionomer solution (5 wt% in H<sub>2</sub>O). Next, the catalyst slurry was slowly dropped onto the carbon paper (Sigracet 29 BC) to attain a catalyst loading of ~0.5 mg cm<sup>-2</sup> as a gas diffusion electrode (GDE). Nickel mesh was used as the anode and Ag/AgCl served as the reference electrode. A proton exchange membrane (171001, Nafion N117) was used to separate the cathode and anode chambers. All potentials were referenced to a reversible hydrogen electrode (RHE) by  $E$  (V vs. RHE) =  $E$  (V vs. Ag/AgCl) + 0.198 V + 0.059 × pH. The catholyte was purged with CO<sub>2</sub> or Ar prior to the electrochemical experiments. During the electrolysis, CO<sub>2</sub> gas was fed from the no-catalyst side of the GDE at a flow rate of 20 s.c.c.m., and both catholyte and anolyte were continuously cycled at a rate of 20 mL min<sup>-1</sup> under pump drive.

### **Electrochemical experiments in H-type cell**

In H-type cell, the carbon paper-loaded catalyst (0.5 mg cm<sup>-2</sup>), Pt foil and Ag/AgCl were used as the working, counter and reference electrodes, respectively. The electrolyte is consistent with the solution in the flow cell. The catholyte was purged with CO<sub>2</sub> or Ar prior to electrochemical experiments. During the electrolysis, a flow of CO<sub>2</sub> with a rate of 20 s.c.c.m. was continuously fed in the catholyte. After electrolysis at specified potentials for 1 h, the produced urea was quantitatively determined by the urease decomposition method.

### Determination of urea

Urea concentration was detected via urease decomposition method<sup>1</sup>. Typically, 0.2 mL of urease solution with concentration of 5 mg mL<sup>-1</sup> was added into 2 mL of urea electrolyte, and then reacted at 37°C in constant temperature shaker for 40 min. Urea was decomposed by urease into CO<sub>2</sub> and two NH<sub>3</sub> molecules. After the decomposition, NH<sub>3</sub> concentration of urea electrolyte with urease ( $c_{\text{urease}}$ ) was detected via above indophenol blue method. Meanwhile, NH<sub>3</sub> concentration contained in urea electrolyte without urease ( $c_{\text{NH}_3}$ ) was also quantified by indophenol blue method. Urea concentration ( $c_{\text{urea}}$ ) in electrolyte were calculated by the following equation:

$$c_{\text{urea}} = (c_{\text{urease}} - c_{\text{NH}_3})/2 \quad (1)$$

The urea yield rate and FE<sub>urea</sub> were calculated by the following equation:

$$\text{Urea yield rate} = (c_{\text{urea}} \times V) / (60.06 \times t \times m) \quad (2)$$

$$\text{FE}_{\text{urea}} (\%) = (12 \times F \times c \times V) / (60.06 \times Q) \times 100\% \quad (3)$$

where  $c_{\text{urea}}$  (mg mL<sup>-1</sup>) is the measured urea concentration,  $V$  (mL) is the volume of the electrolyte,  $t$  (h) is the reduction time,  $m$  (mg) is the catalyst loadings,  $F$  (96500 C mol<sup>-1</sup>) is the Faraday constant,  $Q$  (C) is the quantity of applied electricity.

The generated NH<sub>3</sub> was determined by the indophenol blue method<sup>2</sup> and the generated NO<sub>2</sub><sup>-</sup> in electrolyte was determined by a Griess test<sup>3</sup>.

### Characterizations

X-ray diffraction (XRD) pattern was collected on a Rigaku D/max 2400 diffractometer with Cu K $\alpha$  radiation ( $\lambda = 1.5418 \text{ \AA}$ , 40 kV). Transmission electron

microscopy (TEM) and high-resolution transmission electron microscopy (HRTEM) were performed on a Tecnai G<sup>2</sup> F20 microscope. Online differential electrochemical mass spectrometry (DEMS, QAS 100) was performed by QAS 100 spectrometer. Various products during the electrolysis reactions were monitored at different values of  $m/z$  signals.

### Calculation details

Spin-polarized density functional theory (DFT) calculations were carried out using the Cambridge sequential total energy package (CASTEP) with projector augmented wave pseudopotentials. The Perdew-Burke-Ernzerhof (PBE) generalized gradient approximation (GGA) functional was used for the exchange-correlation potential. The van der Waals interaction was described by using the empirical correction in Grimme's scheme (DFT+D). During the geometry optimization, the electron wave functions were expanded using plane waves with a cutoff energy of 400 eV. The convergence tolerance was set to be  $1.0 \times 10^{-5}$  eV for energy and  $0.02$  eV  $\text{\AA}^{-1}$  for force. The  $3 \times 3 \times 1$  Monkhorst-Pack mesh was used in Brillouin zone sampling. U-Zn (101) was modeled by  $4 \times 4$  supercell (removing one surface Zn atom), and a vacuum region of  $15 \text{\AA}$  was used to separate adjacent slabs.

The computational hydrogen electrode (CHE) model was adopted to calculate the Gibbs free energy change ( $\Delta G$ ) for each elementary step as follows:

$$\Delta G = \Delta E + \Delta E_{\text{ZPE}} - T\Delta S \quad (4)$$

where  $\Delta E$  represents the electronic energy contribution directly derived from DFT calculations.  $\Delta E_{\text{ZPE}}$  and  $T\Delta S$  denote the contributions of zero-point energy and entropy (at 298.15 K), respectively. These values can be obtained from the NIST database for free molecules.

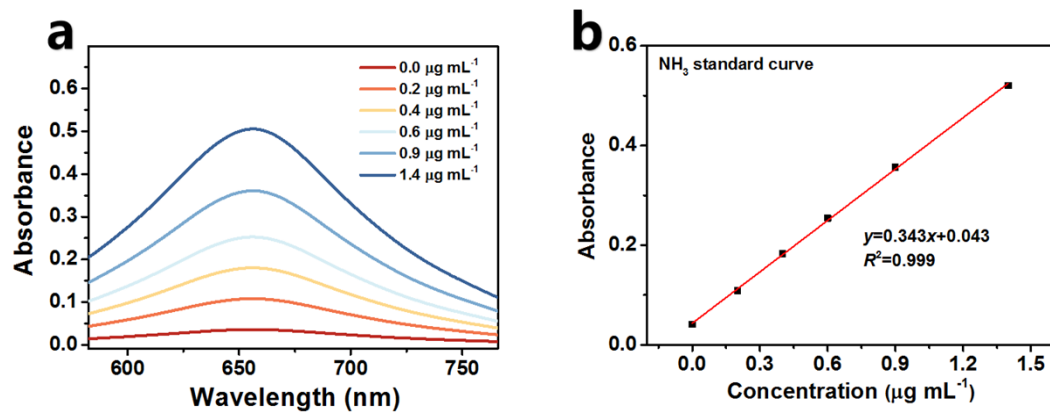

Fig. S1. (a) UV-vis absorption spectra of  $\text{NH}_4\text{Cl}$  assays after incubated for 2 h at ambient conditions. (b) Calibration curve used for the calculation of  $\text{NH}_3$  concentrations.

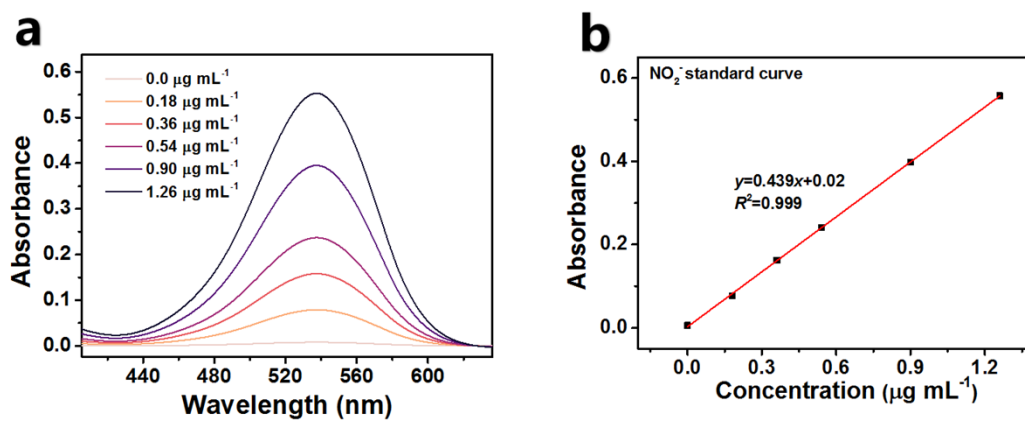

Fig. S2. (a) UV-vis absorption spectra of  $\text{NO}_2^-$  assays after incubated for 20 min at ambient conditions. (b) Calibration curve used for calculation of  $\text{NO}_2^-$  concentrations.

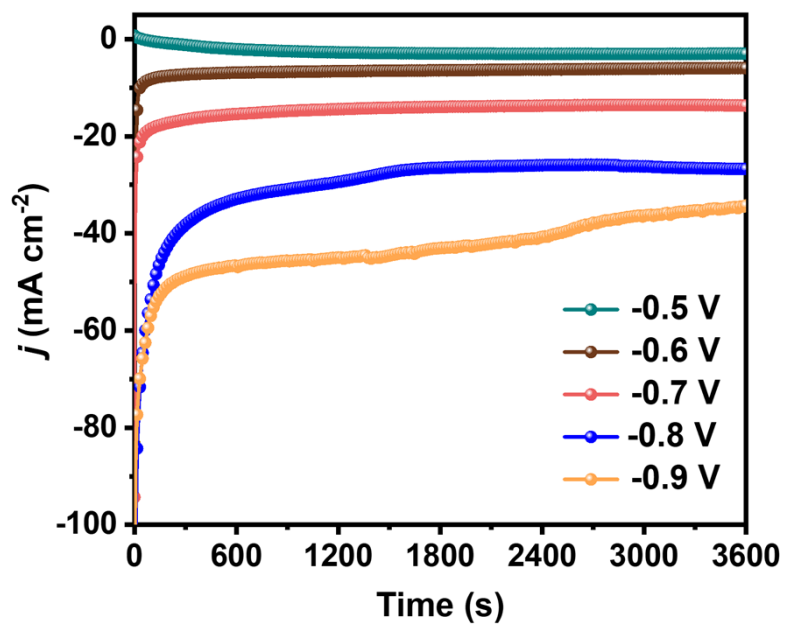

Fig. S3. Chronoamperometry curves of U-Zn at different potentials after 1 h of ENCU electrolysis.

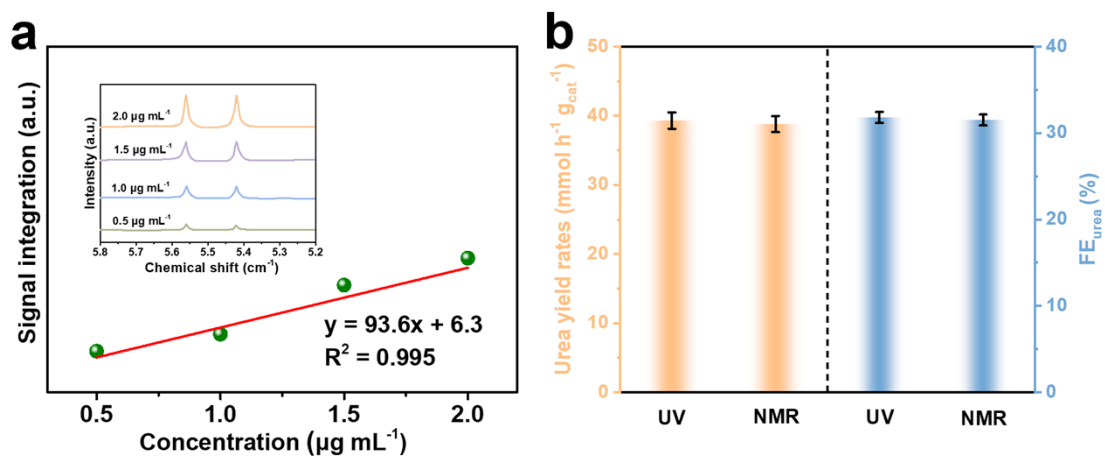

Fig. S4. (a) <sup>1</sup>H NMR spectra of CO(<sup>15</sup>NH<sub>2</sub>)<sub>2</sub> standard samples with different concentrations and corresponding calibration curves. (b) Comparison of the electrocatalytic EUCN performance of U-Zn between UV-vis and <sup>1</sup>H NMR methods at -0.8 V.



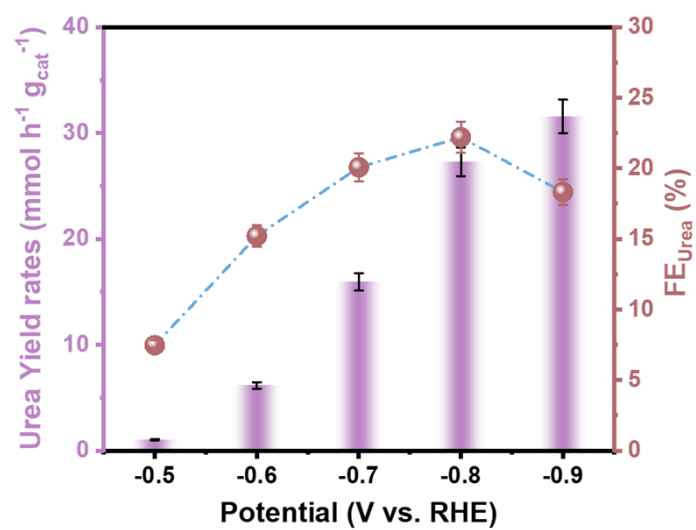

Fig. S5. Urea yield rates and  $FE_{\text{urea}}$  of U-Zn at various potentials in H-type cell.

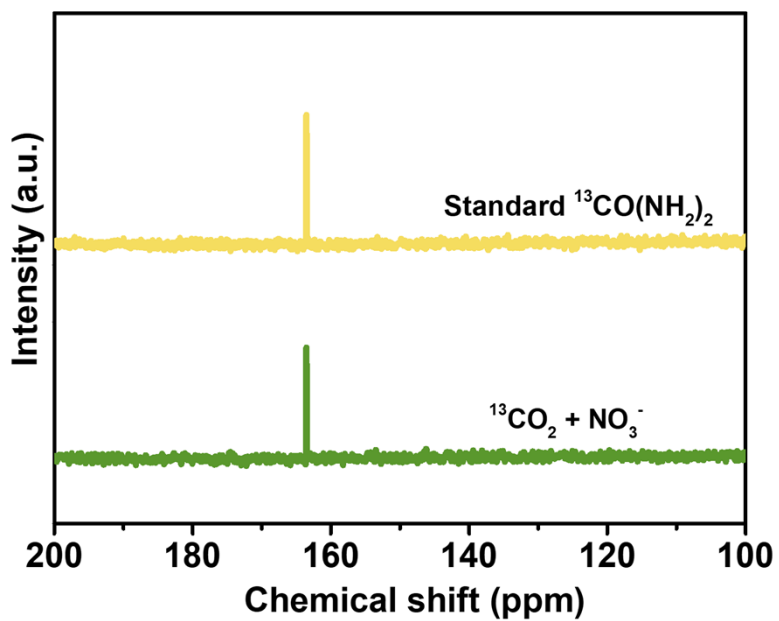

Fig. S6.  $^{13}\text{C}$  NMR spectra of  $^{13}\text{CO}(\text{NH}_2)_2$  standard sample and those fed by  $^{13}\text{CO}_2$  after electrolysis at -0.8 V.

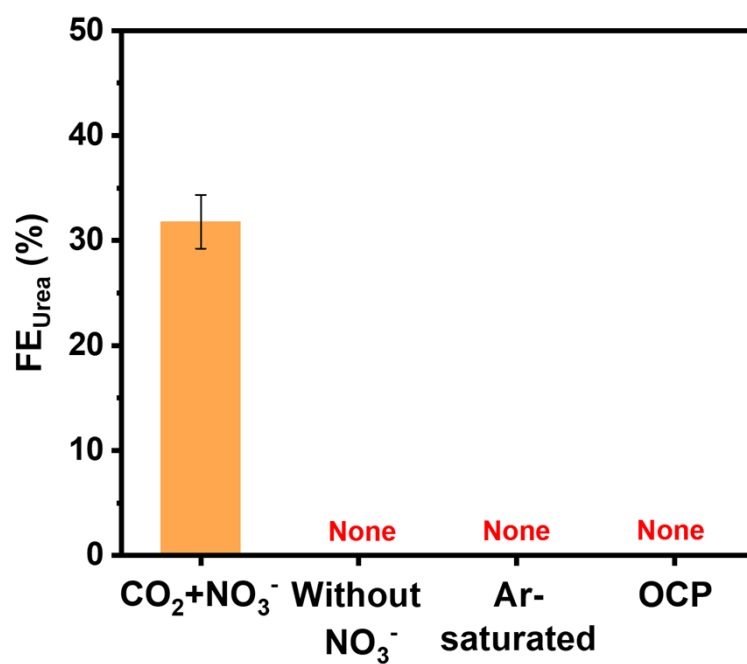

Fig. S7. Amounts of produced urea on U-Zn under different electrolysis conditions: 1) in NO<sub>3</sub><sup>-</sup>/CO<sub>2</sub>-containing solution, 2) without adding NO<sub>3</sub><sup>-</sup>, 3) Ar-saturated solution, 4) open-circuit potential (OCP).

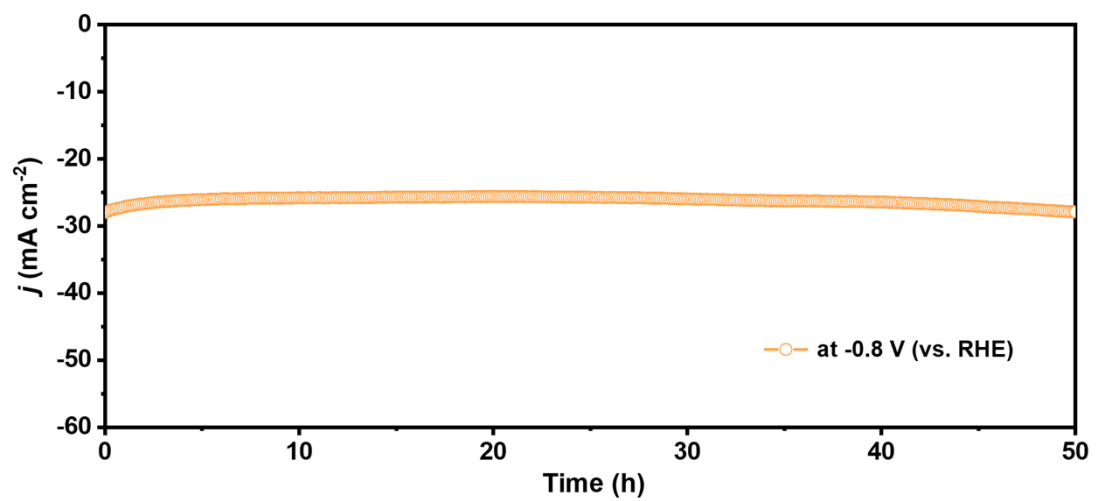

Fig. S8. Long-term stability test of U-Zn for 50 h electrolysis.

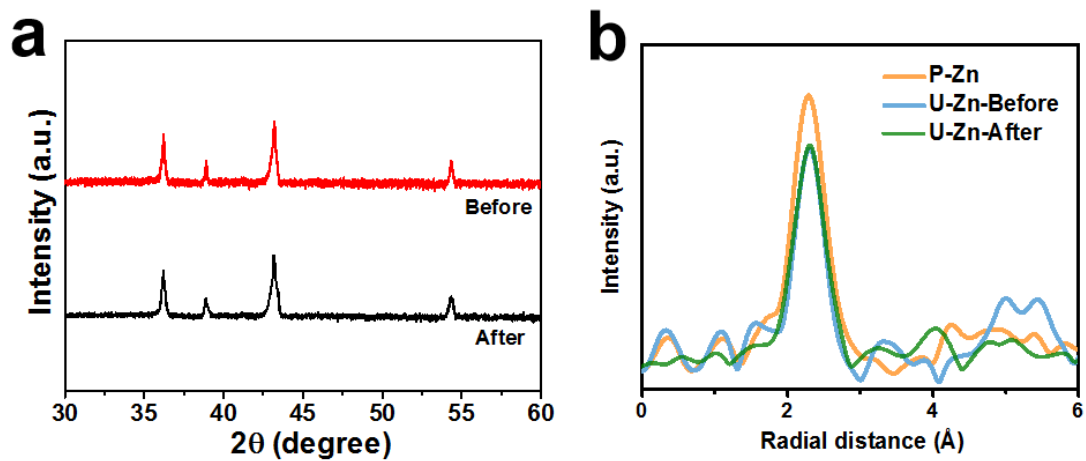

Fig. S9. Characterizations of U-Zn before and after EUCN electrolysis: (a) XRD pattern and (b) EXAFS spectra.

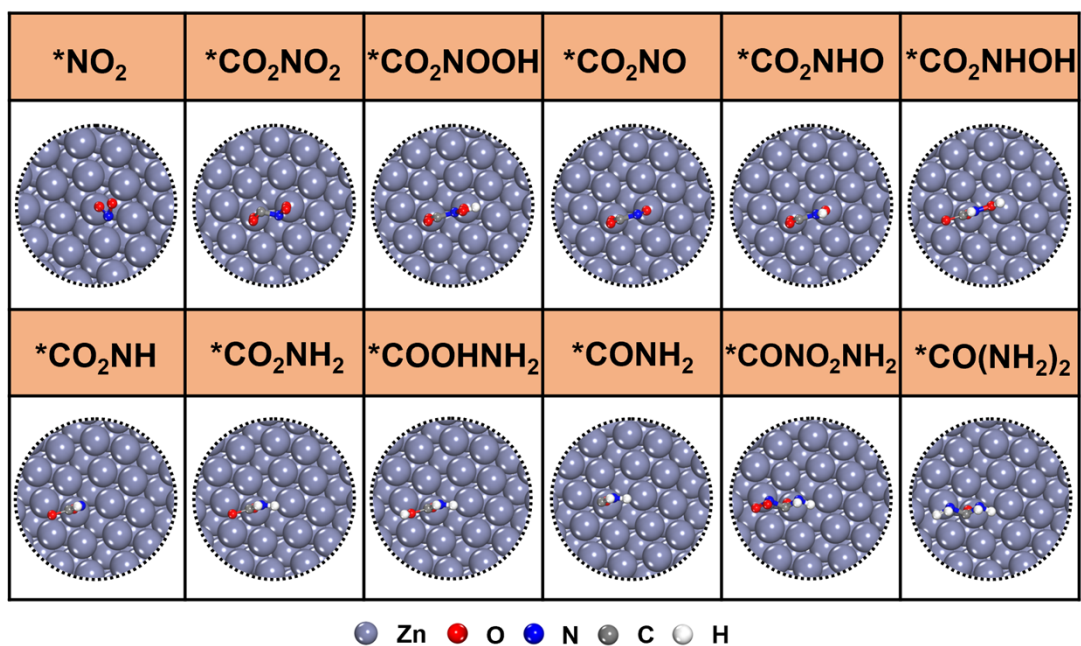

Fig. S10. Optimized atomic configurations of the reaction intermediates on P-Zn.

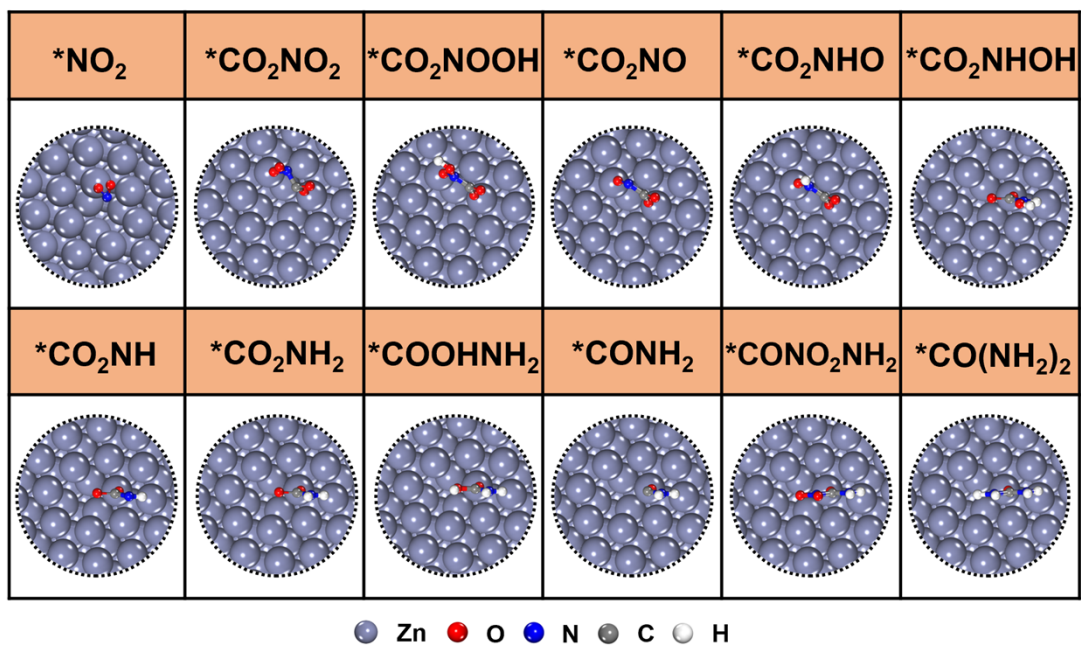

Fig. S11. Optimized structures of the reaction intermediates on U-Zn.

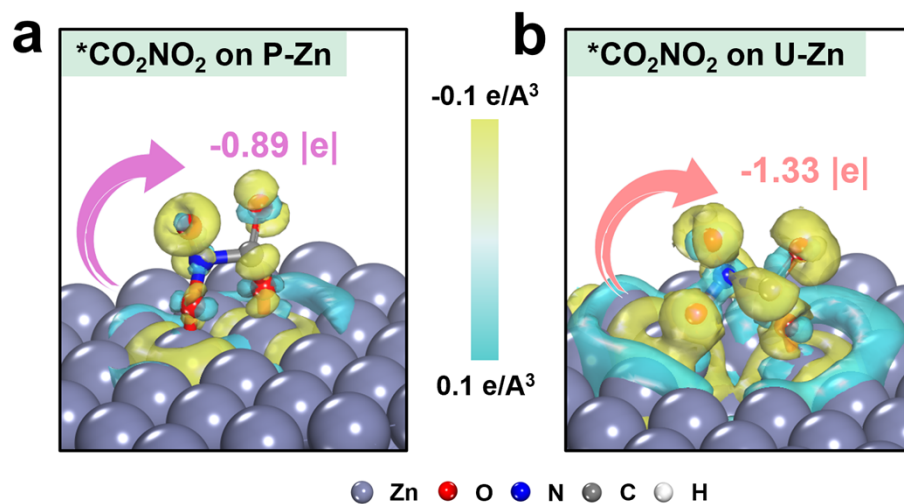

Fig. S12. EDD maps of \*CO<sub>2</sub>NO<sub>2</sub> on (a) P-Zn and (b) U-Zn.



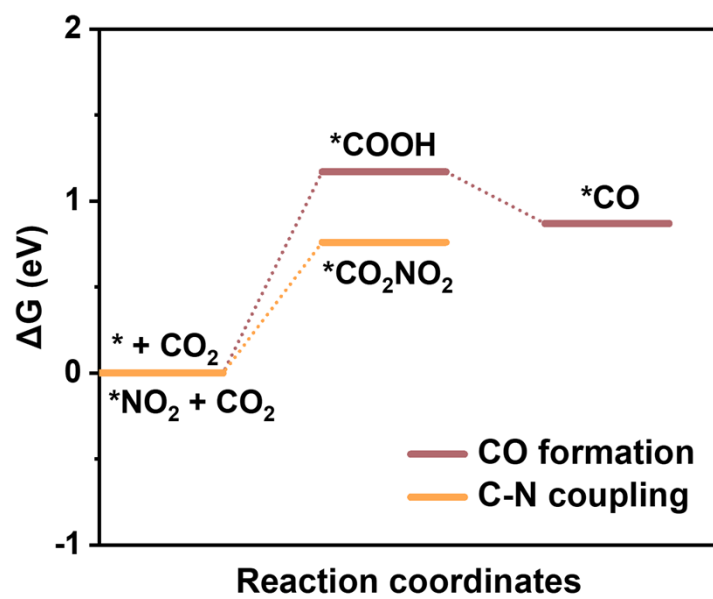

Fig. S13. Free energy profiles of  $*CO_2$  reduction to form  $*CO$  and  $*NO_2/CO_2$  coupling to form  $*CO_2NO_2$  on U-Zn.

Table S1. Comparison of the optimum urea yield rate and  $FE_{\text{urea}}$  for the recently reported state-of-the-art EUCN catalysts at ambient conditions.

| Catalyst               | N/C sources                                   | Electrolyte                                           | Urea yield rate<br>( $\text{mmol h}^{-1} \text{g}_{\text{cat}}^{-1}$ ) | $FE_{\text{urea}}$   | Potential<br>(V vs. RHE) | Ref.         |
|------------------------|-----------------------------------------------|-------------------------------------------------------|------------------------------------------------------------------------|----------------------|--------------------------|--------------|
| In(OH) <sub>3</sub> -S | NO <sub>3</sub> <sup>-</sup> +CO <sub>2</sub> | 0.1 M KNO <sub>3</sub>                                | 8.88                                                                   | 53.4%                | -0.6                     | 4            |
| V <sub>o</sub> -InOOH  | NO <sub>3</sub> <sup>-</sup> +CO <sub>2</sub> | 0.1 M KNO <sub>3</sub>                                | 9.87                                                                   | 51%                  | -0.5                     | 5            |
| Fe-Ni                  | NO <sub>3</sub> <sup>-</sup> +CO <sub>2</sub> | 0.05 M KNO <sub>3</sub><br>+ 0.1 M KHCO <sub>3</sub>  | 20.2                                                                   | 17.8%                | -1.5                     | 6            |
| Cu SACs                | NO <sub>3</sub> <sup>-</sup> +CO <sub>2</sub> | 0.1 M KNO <sub>3</sub><br>+0.1 M KHCO <sub>3</sub>    | 29.97                                                                  | 28%                  | -0.9                     | 7            |
| F-CNT                  | NO <sub>2</sub> <sup>-</sup> +CO <sub>2</sub> | 0.1 M KNO <sub>3</sub>                                | 6.36                                                                   | 18%                  | -0.65                    | 8            |
| Cu-TiO <sub>2-x</sub>  | NO <sub>2</sub> <sup>-</sup> +CO <sub>2</sub> | 0.02 M KNO <sub>2</sub><br>+0.2 M KHCO <sub>3</sub>   | 20.8                                                                   | 43.1%                | -0.4                     | 9            |
| MoO <sub>x</sub> /C    | NO <sub>3</sub> <sup>-</sup> +CO <sub>2</sub> | 0.1 M KNO <sub>3</sub>                                | 23.83                                                                  | 27.7%                | -0.6                     | 10           |
| m-Cu <sub>2</sub> O    | NO <sub>2</sub> <sup>-</sup> +CO <sub>2</sub> | 0.01 M NaNO <sub>3</sub><br>+ 0.1 M KHCO <sub>3</sub> | 29.2                                                                   | 9.43%                | -1.3                     | 11           |
| FeNi <sub>3</sub>      | NO <sub>3</sub> <sup>-</sup> +CO <sub>2</sub> | 0.1 M KNO <sub>3</sub>                                | 8.27                                                                   | 16.58%               | -0.9                     | 12           |
| U-Zn                   | NO <sub>3</sub> <sup>-</sup> +CO <sub>2</sub> | 0.1 M KNO <sub>3</sub><br>+0.1 M KHCO <sub>3</sub>    | 27.3 (H-cell)                                                          | 22.2%<br>(H-cell)    | -0.8                     | This<br>Work |
|                        |                                               |                                                       | 39.3 (Flow-cell)                                                       | 31.8%<br>(Flow-cell) | -0.8                     |              |

## Supplementary references

1. X. Wei, X. Wen, Y. Liu, C. Chen, C. Xie, D. Wang, M. Qiu, N. He, P. Zhou, W. Chen, J. Cheng, H. Lin, J. Jia, X.-Z. Fu and S. Wang, *J. Am. Chem. Soc.*, 2022, **144**, 11530-11535.
2. P. Li, Z. Jin, Z. Fang and G. Yu, *Energy Environ. Sci.*, 2021, **14**, 3522-3531.
3. Z.-Y. Wu, M. Karamad, X. Yong, Q. Huang, D. A. Cullen, P. Zhu, C. Xia, Q. Xiao, M. Shakouri, F.-Y. Chen, J. Y. Kim, Y. Xia, K. Heck, Y. Hu, M. S. Wong, Q. Li, I. Gates, S. Siahrostami and H. Wang, *Nat. Commun.*, 2021, **12**, 2870.
4. C. Lv, L. Zhong, H. Liu, Z. Fang, C. Yan, M. Chen, Y. Kong, C. Lee, D. Liu, S. Li, J. Liu, L. Song, G. Chen, Q. Yan and G. Yu, *Nat. Sustain.*, 2021, **4**, 868-876.
5. C. Lv, C. Lee, L. Zhong, H. Liu, J. Liu, L. Yang, C. Yan, W. Yu, H. H. Hng, Z. Qi, L. Song, S. Li, K. P. Loh, Q. Yan and G. Yu, *ACS Nano*, 2022, **16**, 8213-8222.
6. X. Zhang, X. Zhu, S. Bo, C. Chen, M. Qiu, X. Wei, N. He, C. Xie, W. Chen, J. Zheng, P. Chen, S. P. Jiang, Y. Li, Q. Liu and S. Wang, *Nat. Commun.*, 2022, **13**, 5337.
7. J. Leverett, T. Tran-Phu, J. A. Yuwono, P. Kumar, C. Kim, Q. Zhai, C. Han, J. Qu, J. Cairney, A. N. Simonov, R. K. Hocking, L. Dai, R. Daiyan and R. Amal, *Adv. Energy Mater.*, 2022, **12**, 2201500.
8. X. Liu, P. V. Kumar, Q. Chen, L. Zhao, F. Ye, X. Ma, D. Liu, X. Chen, L. Dai and C. Hu, *Appl. Catal. B*, 2022, **316**, 121618.
9. N. Cao, Y. Quan, A. Guan, C. Yang, Y. Ji, L. Zhang and G. Zheng, *J. Colloid Interface Sci.*, 2020, **577**, 109-114.
10. M. Sun, G. Wu, J. Jiang, Y. Yang, A. Du, L. Dai, X. Mao and Q. Qin, *Angew. Chem. Int. Edit.*, 2023, **62**, e202301957.
11. M. Qiu, X. Zhu, S. Bo, K. Cheng, N. He, K. Gu, D. Song, C. Chen, X. Wei, D. Wang, Y. Liu, S. Li, X. Tu, Y. Li, Q. Liu, C. Li and S. Wang, *CCS Chem.*, 2023, **5**, 2617-2627.
12. T. Hou, J. Ding, H. Zhang, S. Chen, Q. Liu, J. Luo and X. Liu, *Mater. Chem. Front.*, 2023, **7**, 4952-4960.
